# Supplementary material for: Diagnosis and acute management of patients with concussion at children's hospitals
Source: HighWire-hosted journal article supplement (doi:10.1136/archdischild-2012-303588), 2013-07-13
Supplement: archdischild-2012-303588supp_figure.pdf [file archdischild-2012-303588supp_figure.pdf]

**Data Points for Figure 1:** Over the 10-year study period, the number of ED visits recorded in PHIS with a primary diagnosis of concussion increased significantly ( $p < 0.001$ ) while the number of paediatric concussion admitted to the hospital remained relatively stable with 525 admissions in 2001 and 55 admissions in 2010.

| <b>Year</b> | <b>Primary Diagnosis of Concussion, n</b> | <b>Concussed patients Admitted, n</b> | <b>Predicted Values of Primary Diagnosis of Concussion (Piece-wise regression line)</b> |
|-------------|-------------------------------------------|---------------------------------------|-----------------------------------------------------------------------------------------|
| 2001        | 2126                                      | 525                                   | 2227.43                                                                                 |
| 2002        | 2441                                      | 551                                   | 2374.08                                                                                 |
| 2003        | 2528                                      | 542                                   | 2520.73                                                                                 |
| 2004        | 2722                                      | 637                                   | 2667.38                                                                                 |
| 2005        | 2857                                      | 612                                   | 2814.03                                                                                 |
| 2006        | 2957                                      | 576                                   | 2960.68                                                                                 |
| 2007        | 3035                                      | 539                                   | 3107.33                                                                                 |
| 2008        | 3566                                      | 605                                   | 3701.16                                                                                 |
| 2009        | 4693                                      | 546                                   | 4406.77                                                                                 |
| 2010        | 4967                                      | 555                                   | 5112.39                                                                                 |
